# Supplementary material for: Dissection of the MEF2D-IRF8 transcriptional circuit dependency in acute myeloid leukemia
Source: PubMed Central journal article supplement — iScience. 2022 Sep 15;25(10):105139. doi: 10.1016/j.isci.2022.105139 (PMC9526175; doi:10.1016/j.isci.2022.105139), 2022-09-15
Supplement: mmc1.pdf [file mmc1.pdf]

iScience, Volume 25

## **Supplemental information**

### **Dissection of the MEF2D-IRF8 transcriptional circuit dependency in acute myeloid leukemia**

**Bianca Y. Pingul, Hua Huang, Qingzhou Chen, Fatemeh Alikarami, Zhen Zhang, Jun Qi, Kathrin M. Bernt, Shelley L. Berger, Zhendong Cao, and Junwei Shi**

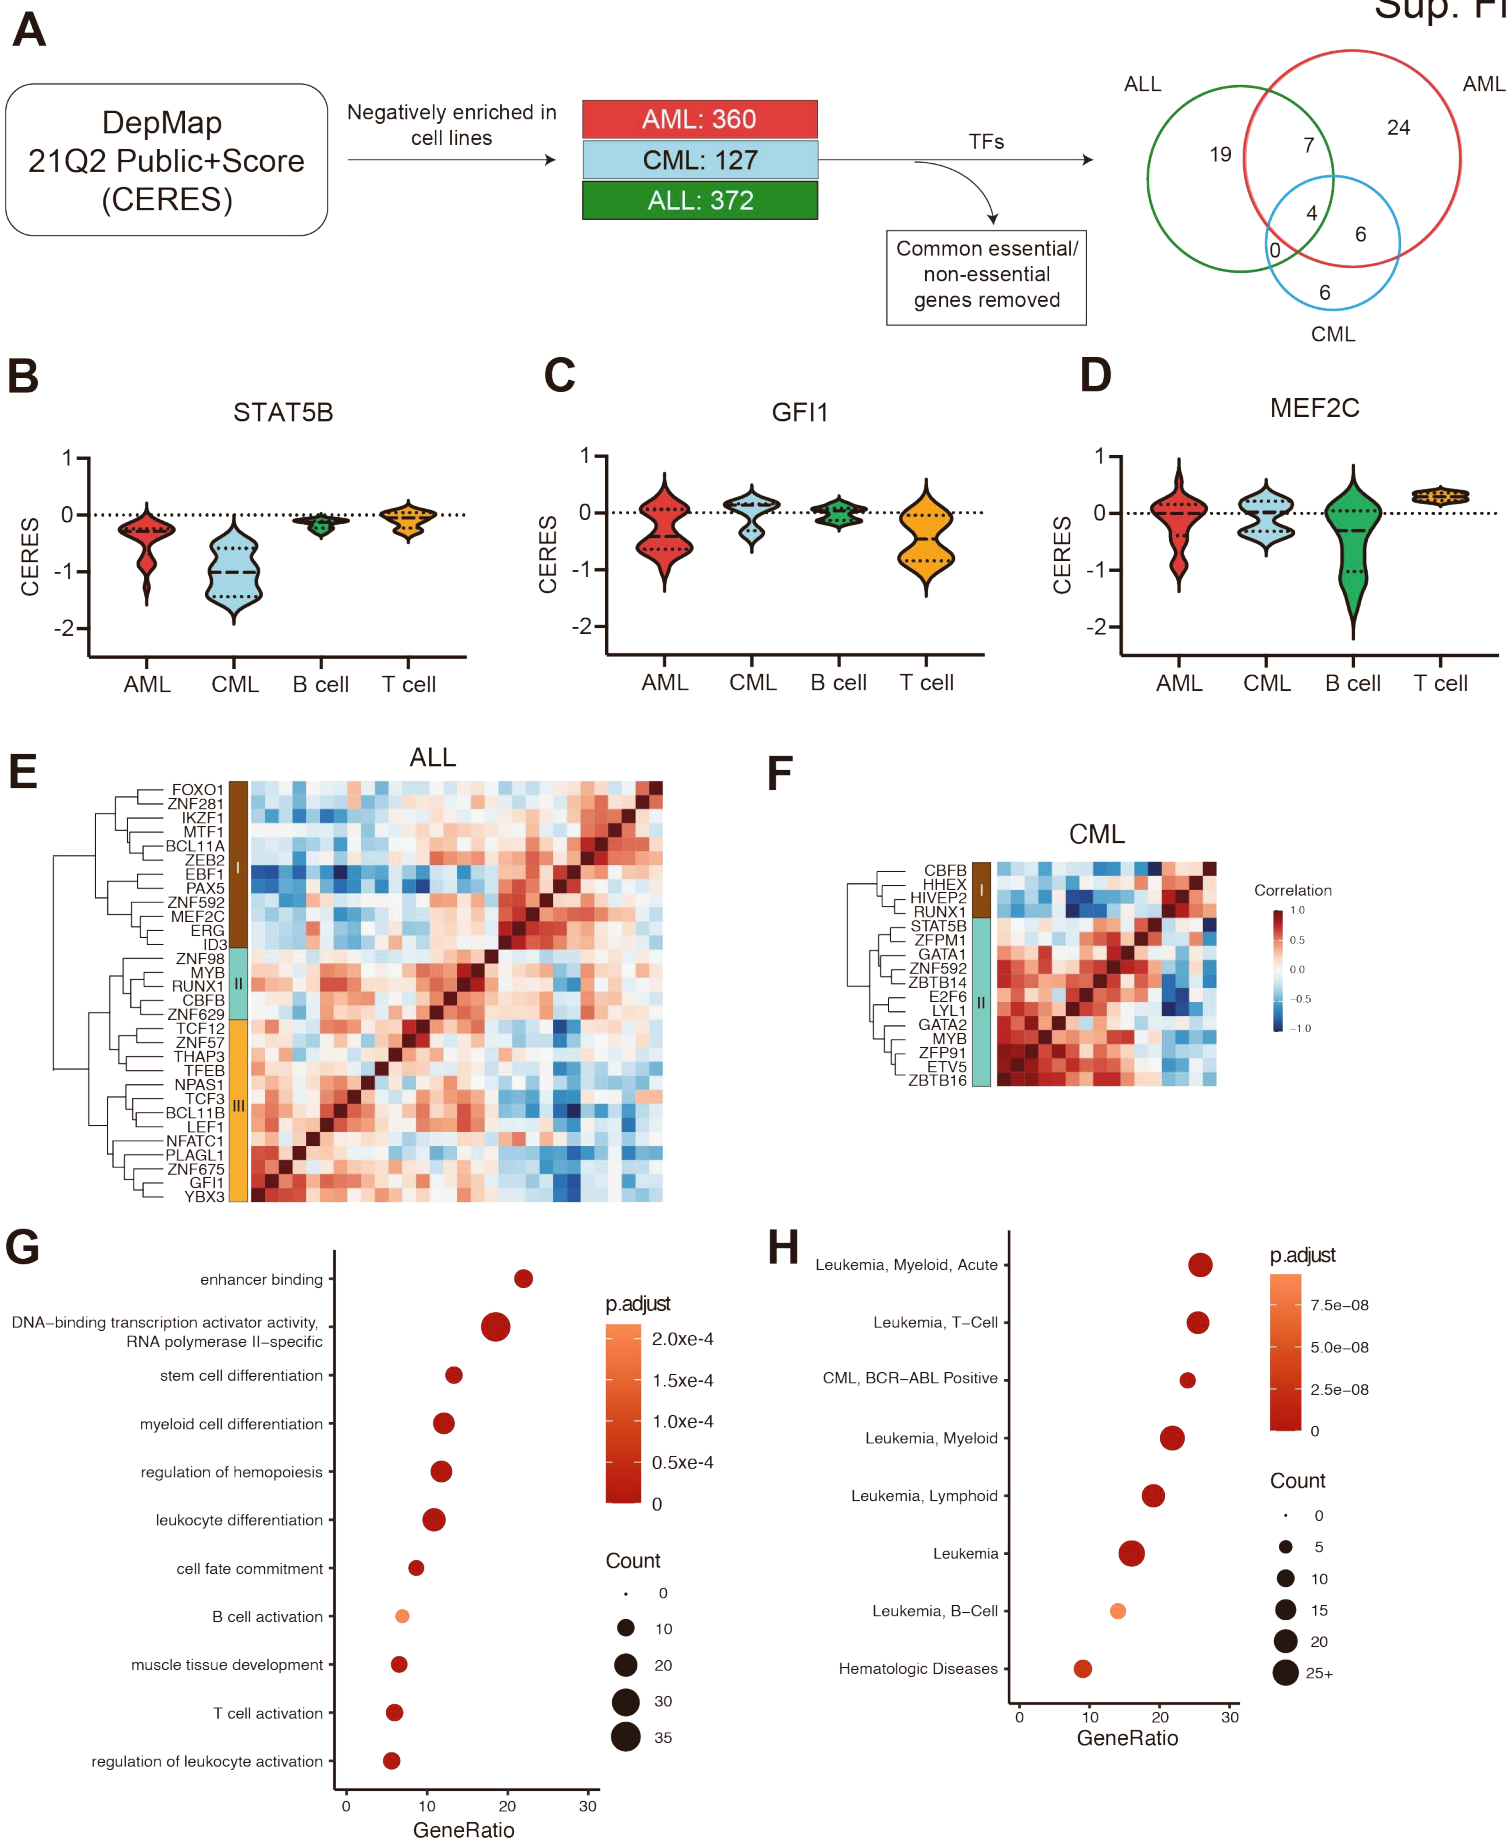

**Figure S1. Integrative analysis of TF dependency map in leukemia. Related to Figure 1.**

(A) Data analysis workflow. Dependency scores CERES were retrieved from Depmap, and 360, 127, 372 negatively enriched dependencies were found in AML, CML and ALL, respectively. Common essential and non-essential genes were removed, and genes containing DNA-binding domains were used for further analysis. (B-D) Additional violin plots of representative TF CERES effects. (E) Pearson correlation matrix of CERES effects of ALL-biased dependencies among all ALL cell lines. (F) Pearson correlation matrix of CERES effects of CML-biased dependencies among all CML cell lines. (G) Gene Ontology (GO) analysis of the 66 enriched TFs using WebGestalt. (H) Over-Representation Analysis (ORA) of 66 enriched TFs with disease\_GLAD4U dataset.

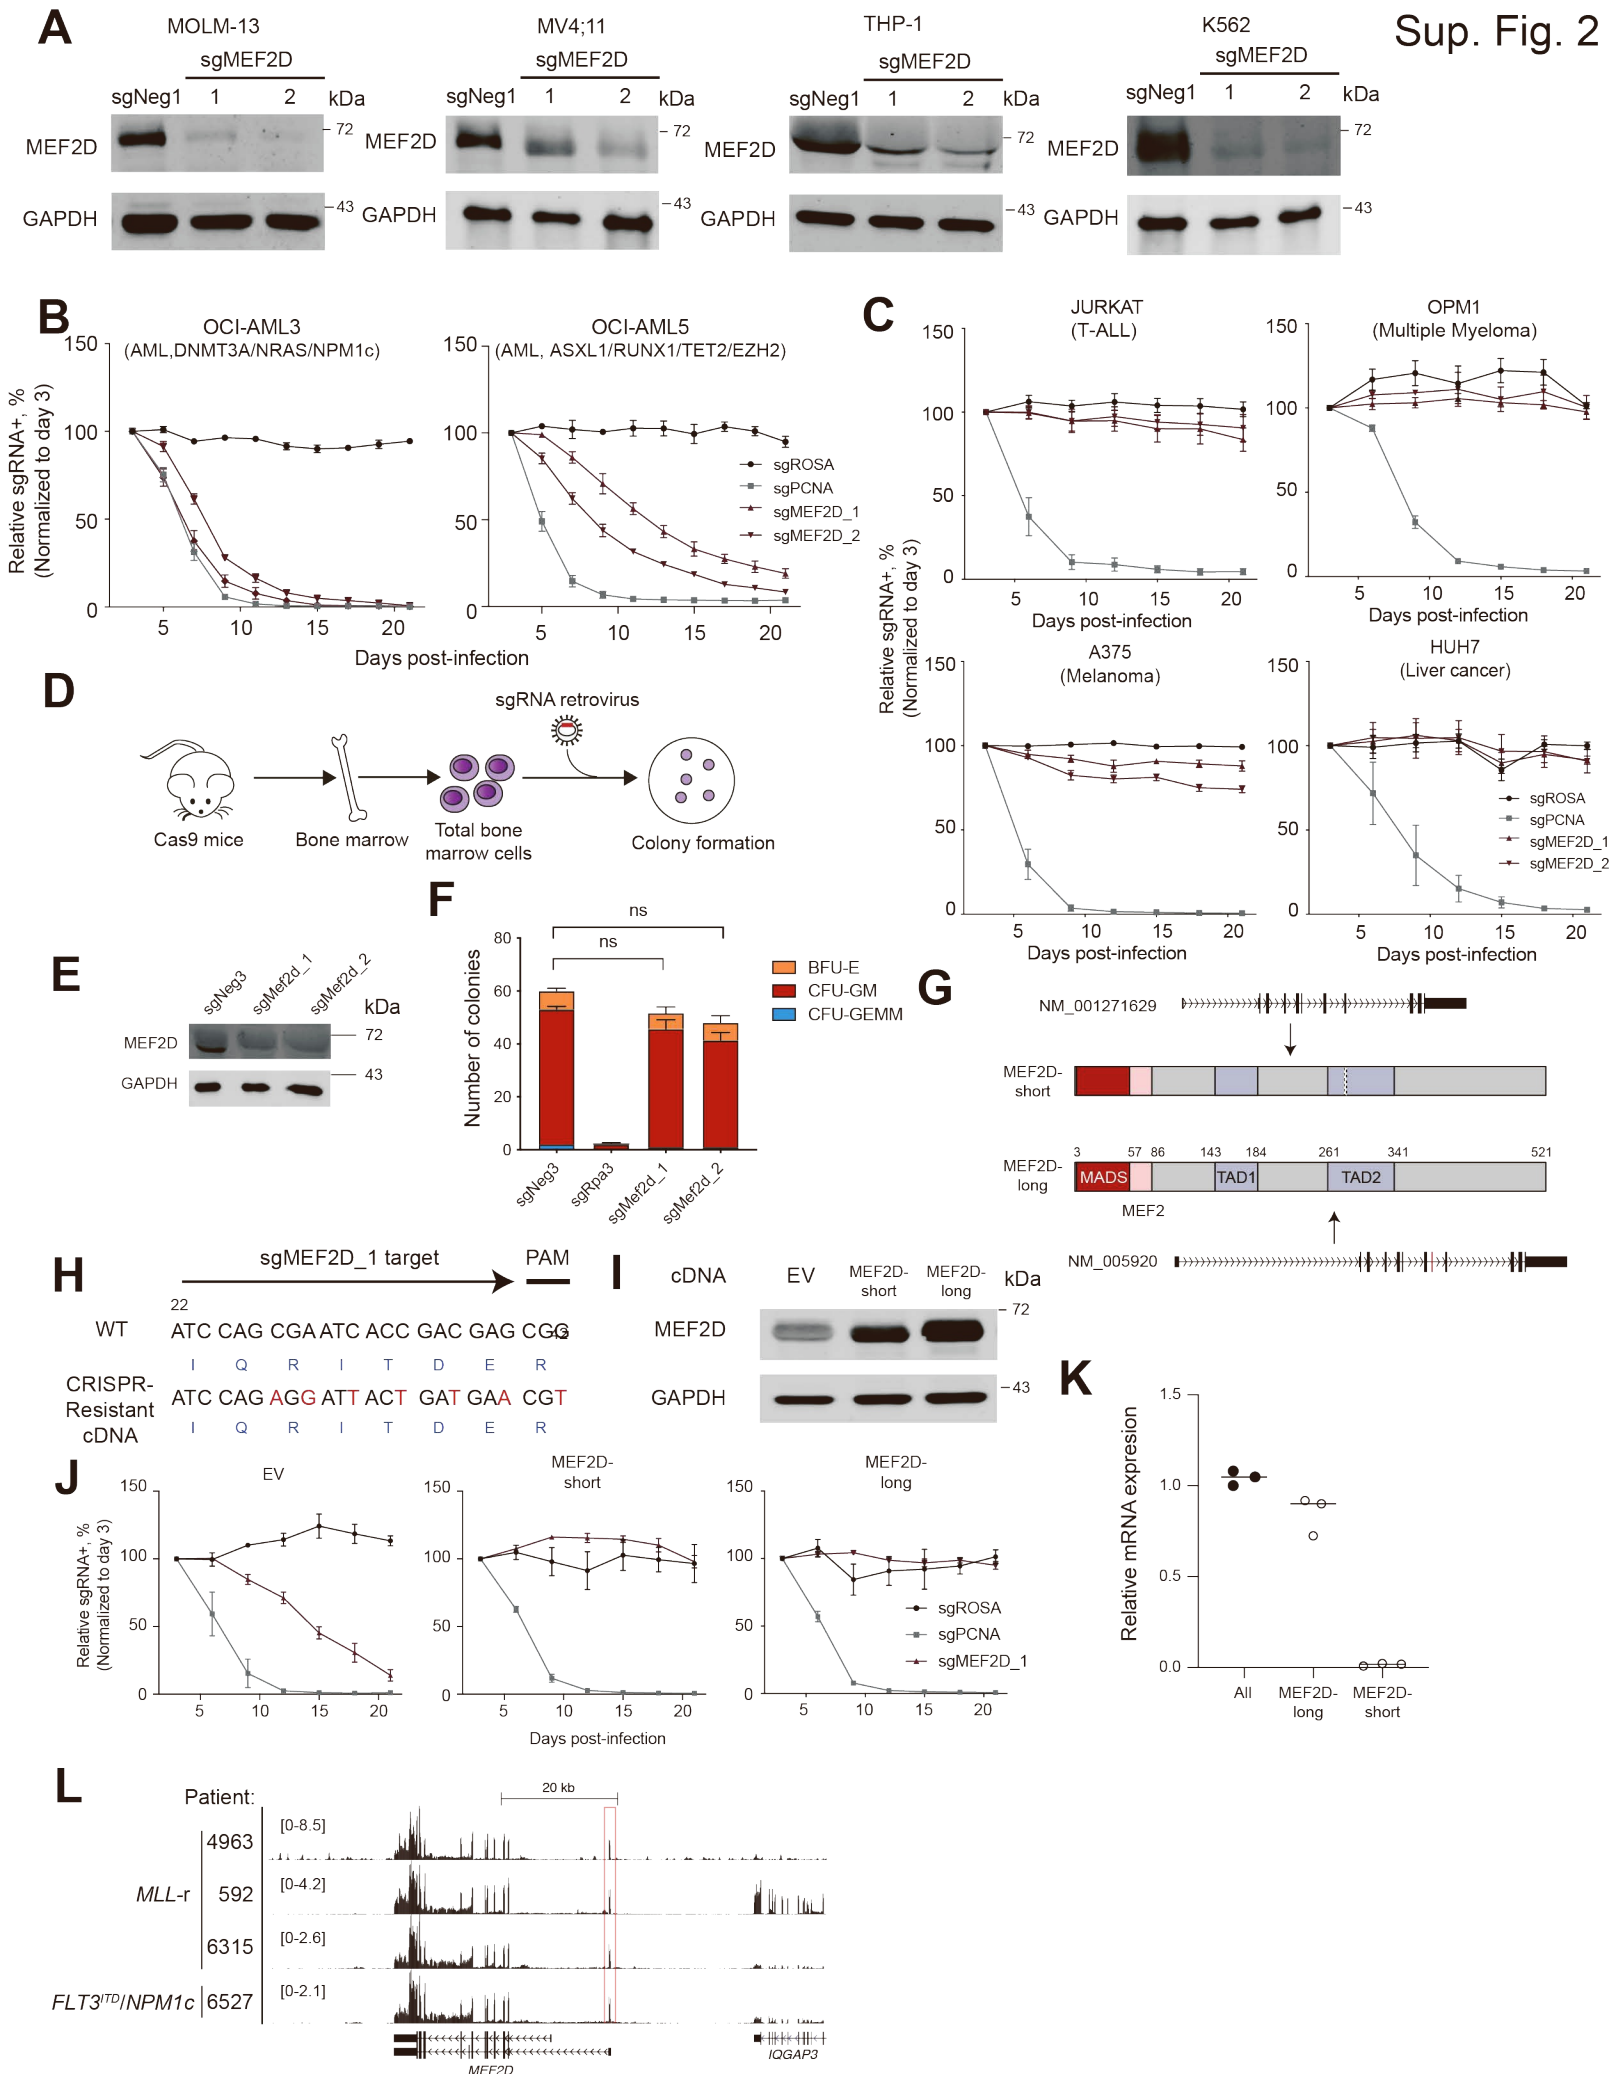

**Figure S2. MEF2D is an AML-biased dependency. Related to Figure 2.**

(A) Immunoblotting of MEF2D in MOLM-13 (AML, upper left), MV4-11 (AML, upper right), THP-1 (AML, bottom left) and K562 (an acute (erythro)blastic transformation of prior CML, bottom right) cells. (B) Competition-based proliferation assays in OCI-AML3 (AML, left) and OCI-AML5 (AML, right) cells (n=3-5, mean  $\pm$  SEM). (C) Competition-based proliferation assays in MEF2D-insensitive cells, including JURKAT (T-ALL, n = 3), OPM1 (multiple myeloma, n = 2-3), A375 (melanoma, n = 4) and HUH7 (Liver cancer, n = 4-6) cell lines (mean  $\pm$  SEM). (D) Schematic of murine bone marrow (BM) colony formation assay. (E) Immunoblotting of MEF2D in whole lysates of BM cells transduced with indicated sgRNAs. (F) Colony formation of Cas9-expressing normal myeloid progenitor cells (n=3). Two-way ANOVA test was performed for statistical analysis. (G) Structure of two human MEF2D isoforms and protein domains (PMID: 29879430). Two isoforms are transcribed from different Transcription Start Site (TSS), and the short isoform (NM\_001271629) skips one exon (labeled in red) and loses 7 amino acids of the TAD2 domain. Except that, the encoded proteins for these two isoforms are identical. MADS, MCM1, AGAMOUS, DEFICIENS and SRF domain. TAD, trans-activation domain. (H) Design of CRISPR-resistant MEF2D cDNA. Encoded amino acids are labeled in blue. (I) Immunoblotting of MEF2D in whole-cell lysates of THP-1 cells transduced with Empty Vector (EV), MEF2D-short or -long cDNA. (J) Competition-based proliferation assays in THP-1 cells stably expressing EV or MEF2D cDNA (n=3, mean  $\pm$  SEM). (K) Reverse transcription-polymerase chain reaction (RT-PCR) indicating relative proportion of the indicated transcripts to total MEF2D transcripts, normalized to GAPDH level (n=3, mean  $\pm$  SEM). (L) UCSC browser tracks of RNA-seq in human primary AML cells, with the key oncogenic mutations labeled on the left. The transcription start site of the MEF2D-long-unique exon was marked by a red box.

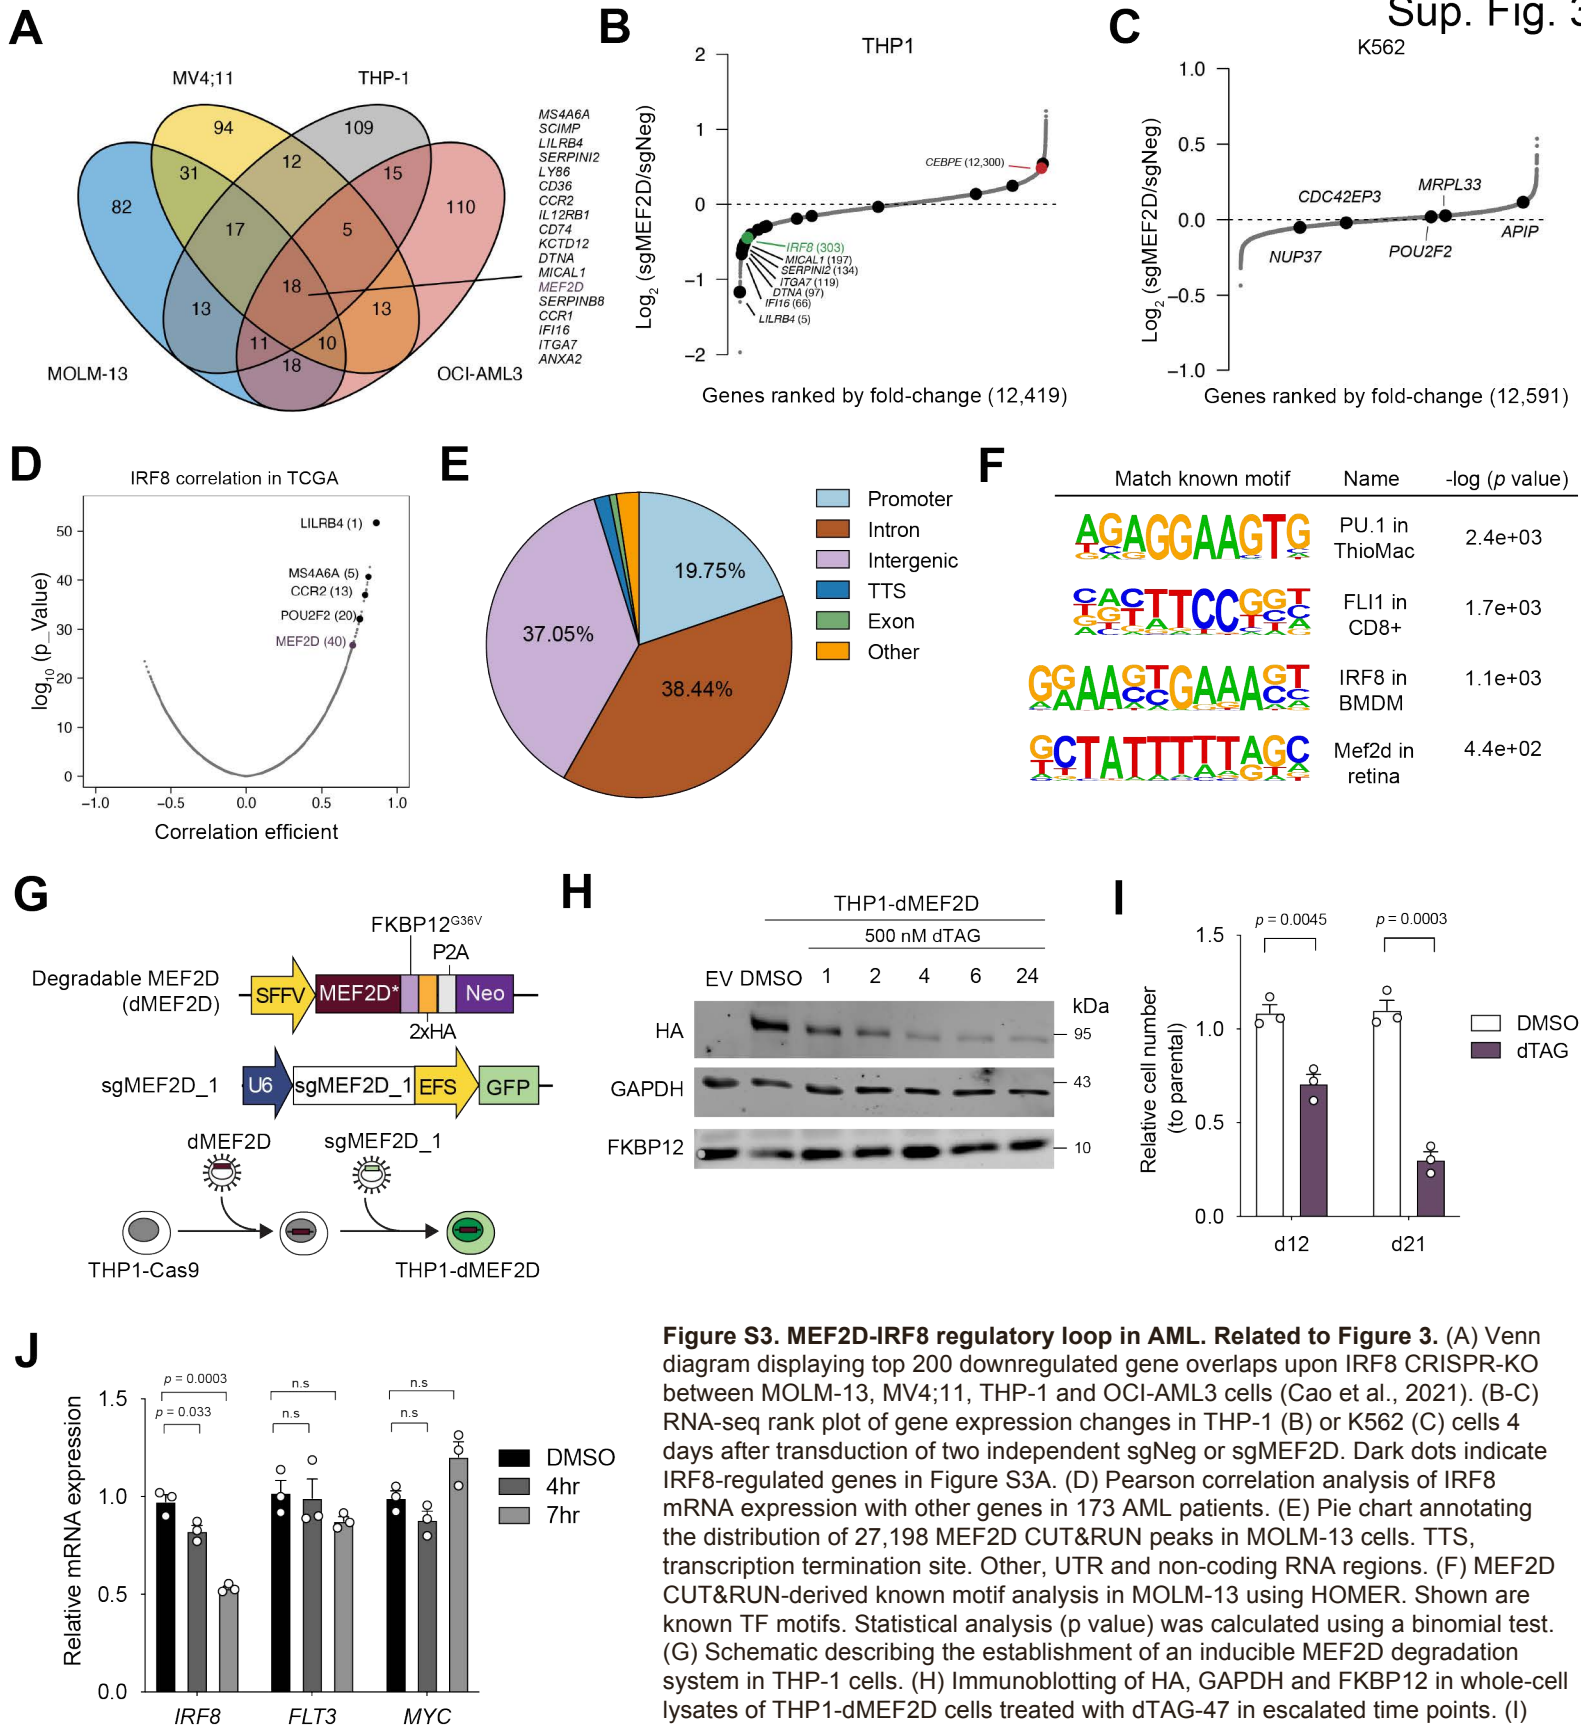

**Figure S3. MEF2D-IRF8 regulatory loop in AML. Related to Figure 3.** (A) Venn diagram displaying top 200 downregulated gene overlaps upon IRF8 CRISPR-KO between MOLM-13, MV4;11, THP-1 and OCI-AML3 cells (Cao et al., 2021). (B-C) RNA-seq rank plot of gene expression changes in THP-1 (B) or K562 (C) cells 4 days after transduction of two independent sgNeg or sgMEF2D. Dark dots indicate IRF8-regulated genes in Figure S3A. (D) Pearson correlation analysis of IRF8 mRNA expression with other genes in 173 AML patients. (E) Pie chart annotating the distribution of 27,198 MEF2D CUT&RUN peaks in MOLM-13 cells. TTS, transcription termination site. Other, UTR and non-coding RNA regions. (F) MEF2D CUT&RUN-derived known motif analysis in MOLM-13 using HOMER. Shown are known TF motifs. Statistical analysis ( $p$  value) was calculated using a binomial test. (G) Schematic describing the establishment of an inducible MEF2D degradation system in THP-1 cells. (H) Immunoblotting of HA, GAPDH and FKBP12 in whole-cell lysates of THP1-dMEF2D cells treated with dTAG-47 in escalated time points. (I) dTAG treatment impaired THP1-dMEF2D cell growth. Relative cell number of THP1-dMEF2D and parental cells were measured on 12 days and 21 days treatment of DMSO (control) or 500nM dTAG-47 ( $n=3$ , mean  $\pm$  SEM, Student's  $t$ -test). (J) RT-qPCR analysis of IRF8, FLT3 and MYC mRNA expression upon 4- and 7-hour 500nM dTAG-47 treatment (normalized to GAPDH,  $n=3$ , mean  $\pm$  SEM, Student's  $t$ -test).

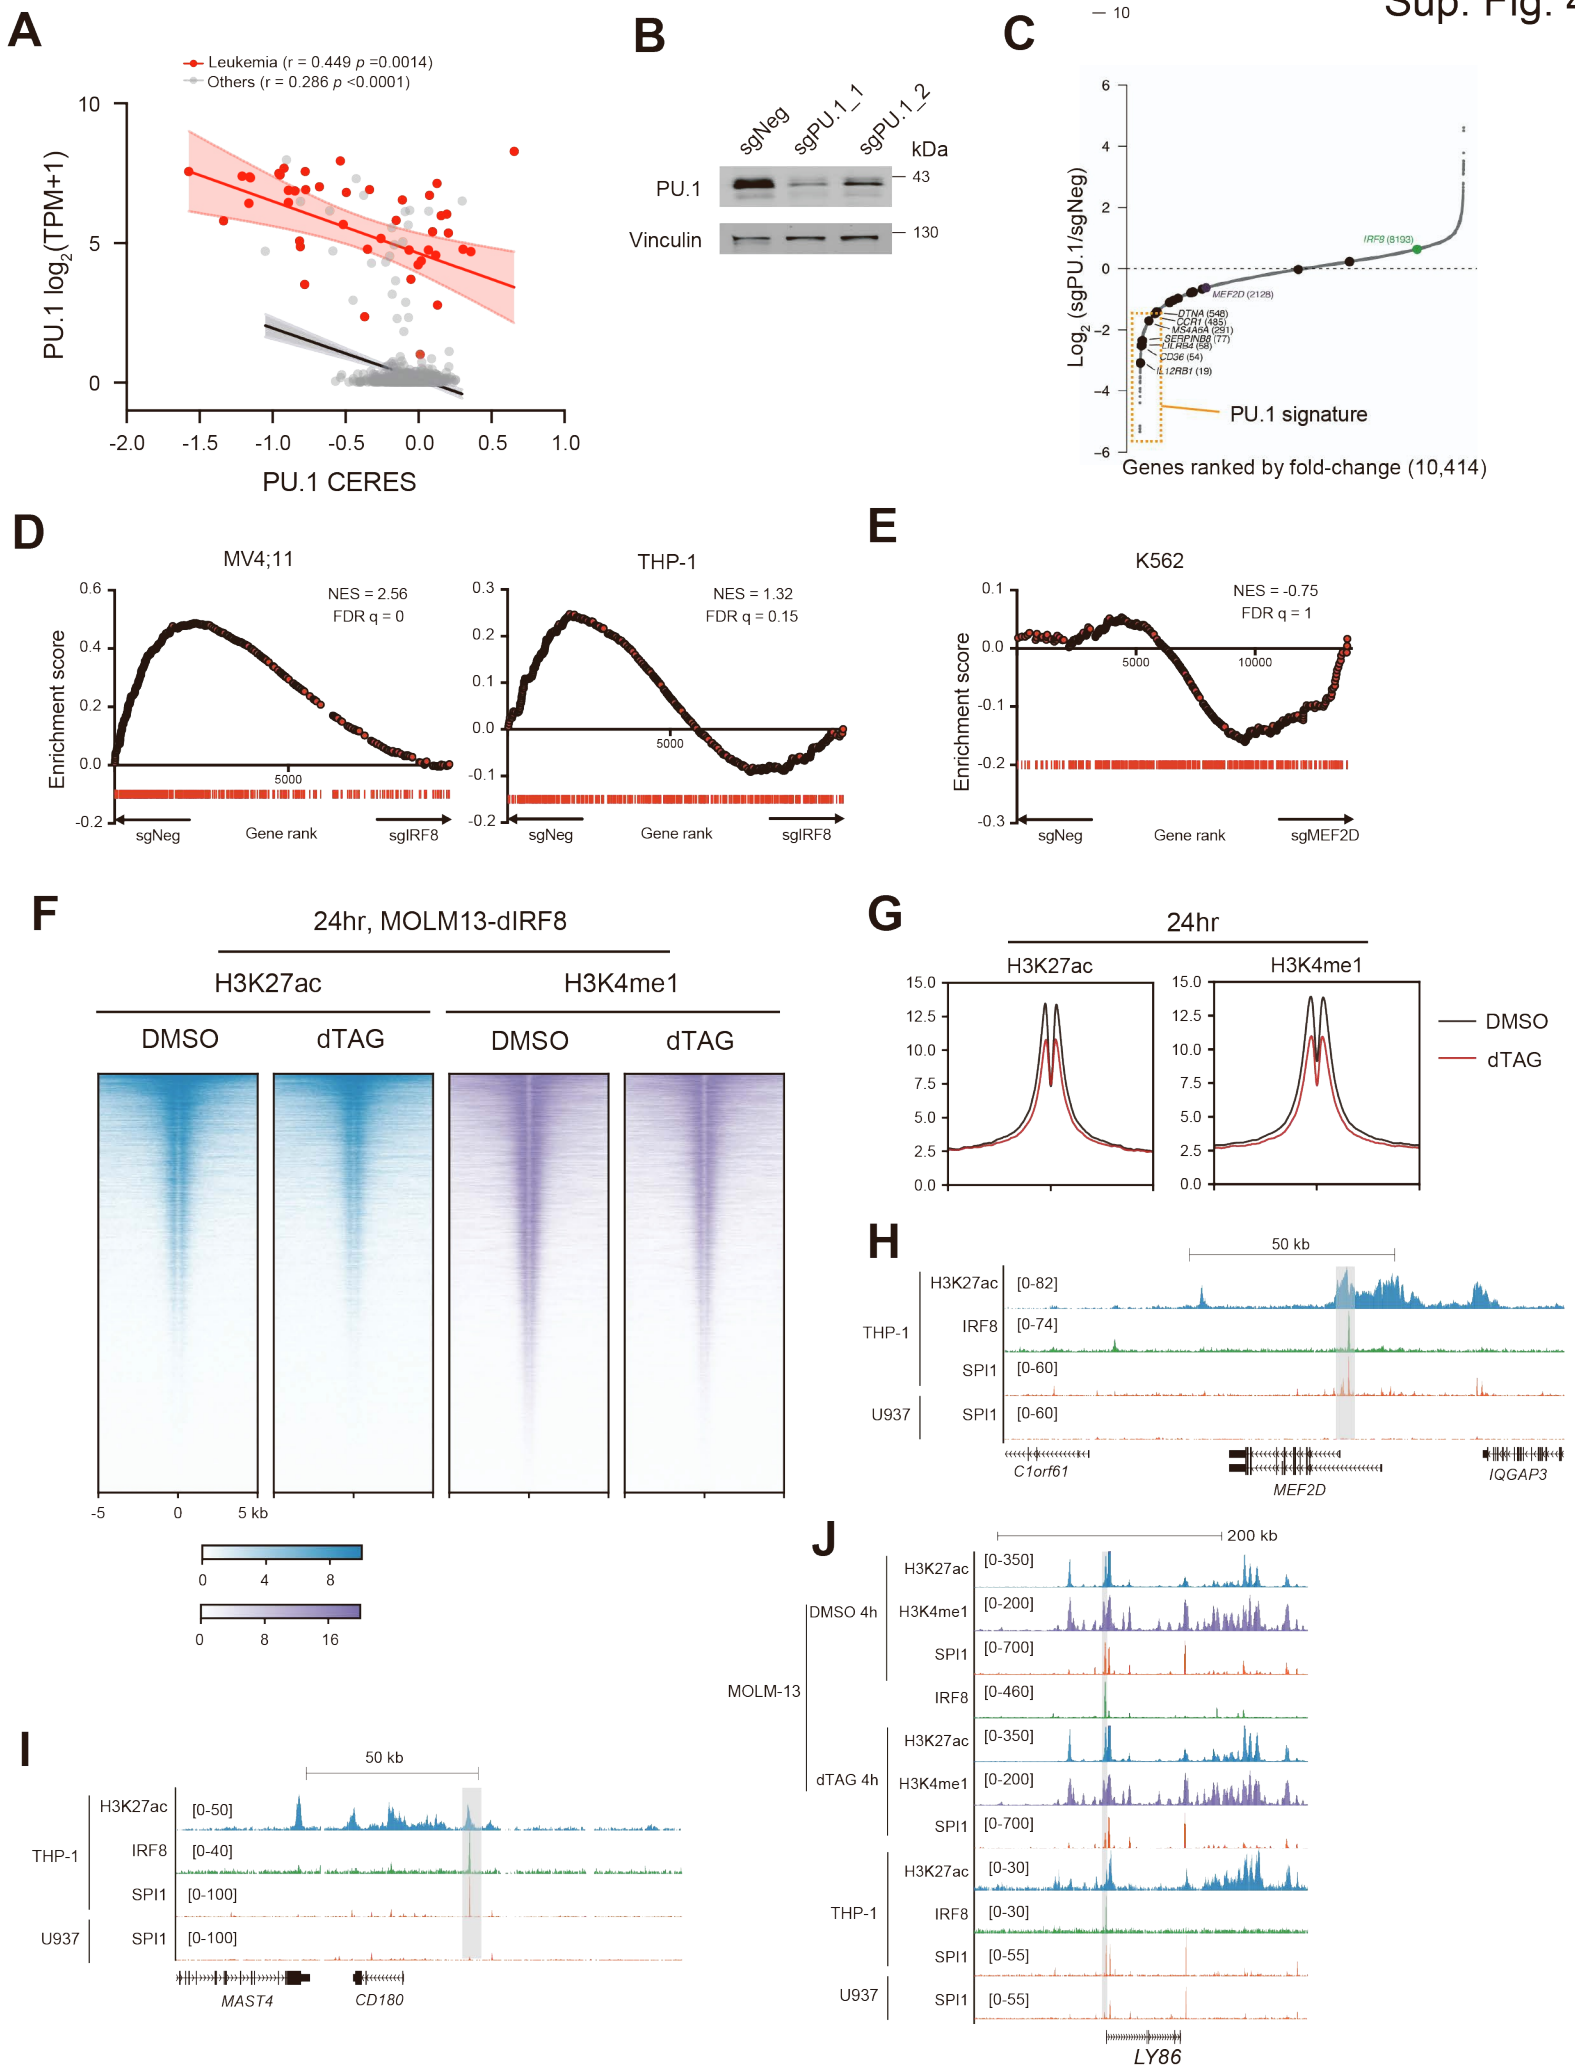

**Figure S4. IRF8 supports PU.1's chromatin occupancy and transcriptional output. Related to Figure 4.**

(A) Scatter plot of PU.1 CERES vs mRNA expression in leukemia (red) or other cancer lines from DepMap. PU.1 signature was defined as the top 500 downregulated genes (labeled in the dashed box) and listed in Table S1. (B) Immunoblotting of PU.1 in MOLM-13 whole cell lysates. (C) RNA-seq rank plot of gene expression changes in MOLM-13 cells 5 days after transduction of two independent sgNeg or sgPU.1. (D) GSEA analysis of IRF8-KO RNA-seq data (Cao et al., 2021) in MV4;11 and THP-1 cells. (E) GSEA analysis of MEF2D-KO RNA-seq data in K562 cells. (F-G) Density plot (F) and meta-profiles (G) of H3K27ac and H3K4me1 ChIP-seq signals at IRF8 binding sites in MOLM13-dIRF8 cells upon 24-hour treatment of DMSO or dTAG. (H-I) Gene tracks of H3K27ac, IRF8, PU.1 ChIP-seq signals in THP-1 or U937 cells at MEF2D (H) or CD180 (I) locus. (J) Gene tracks of ChIP-seq signal from Figure 4C-D at LY86 locus.

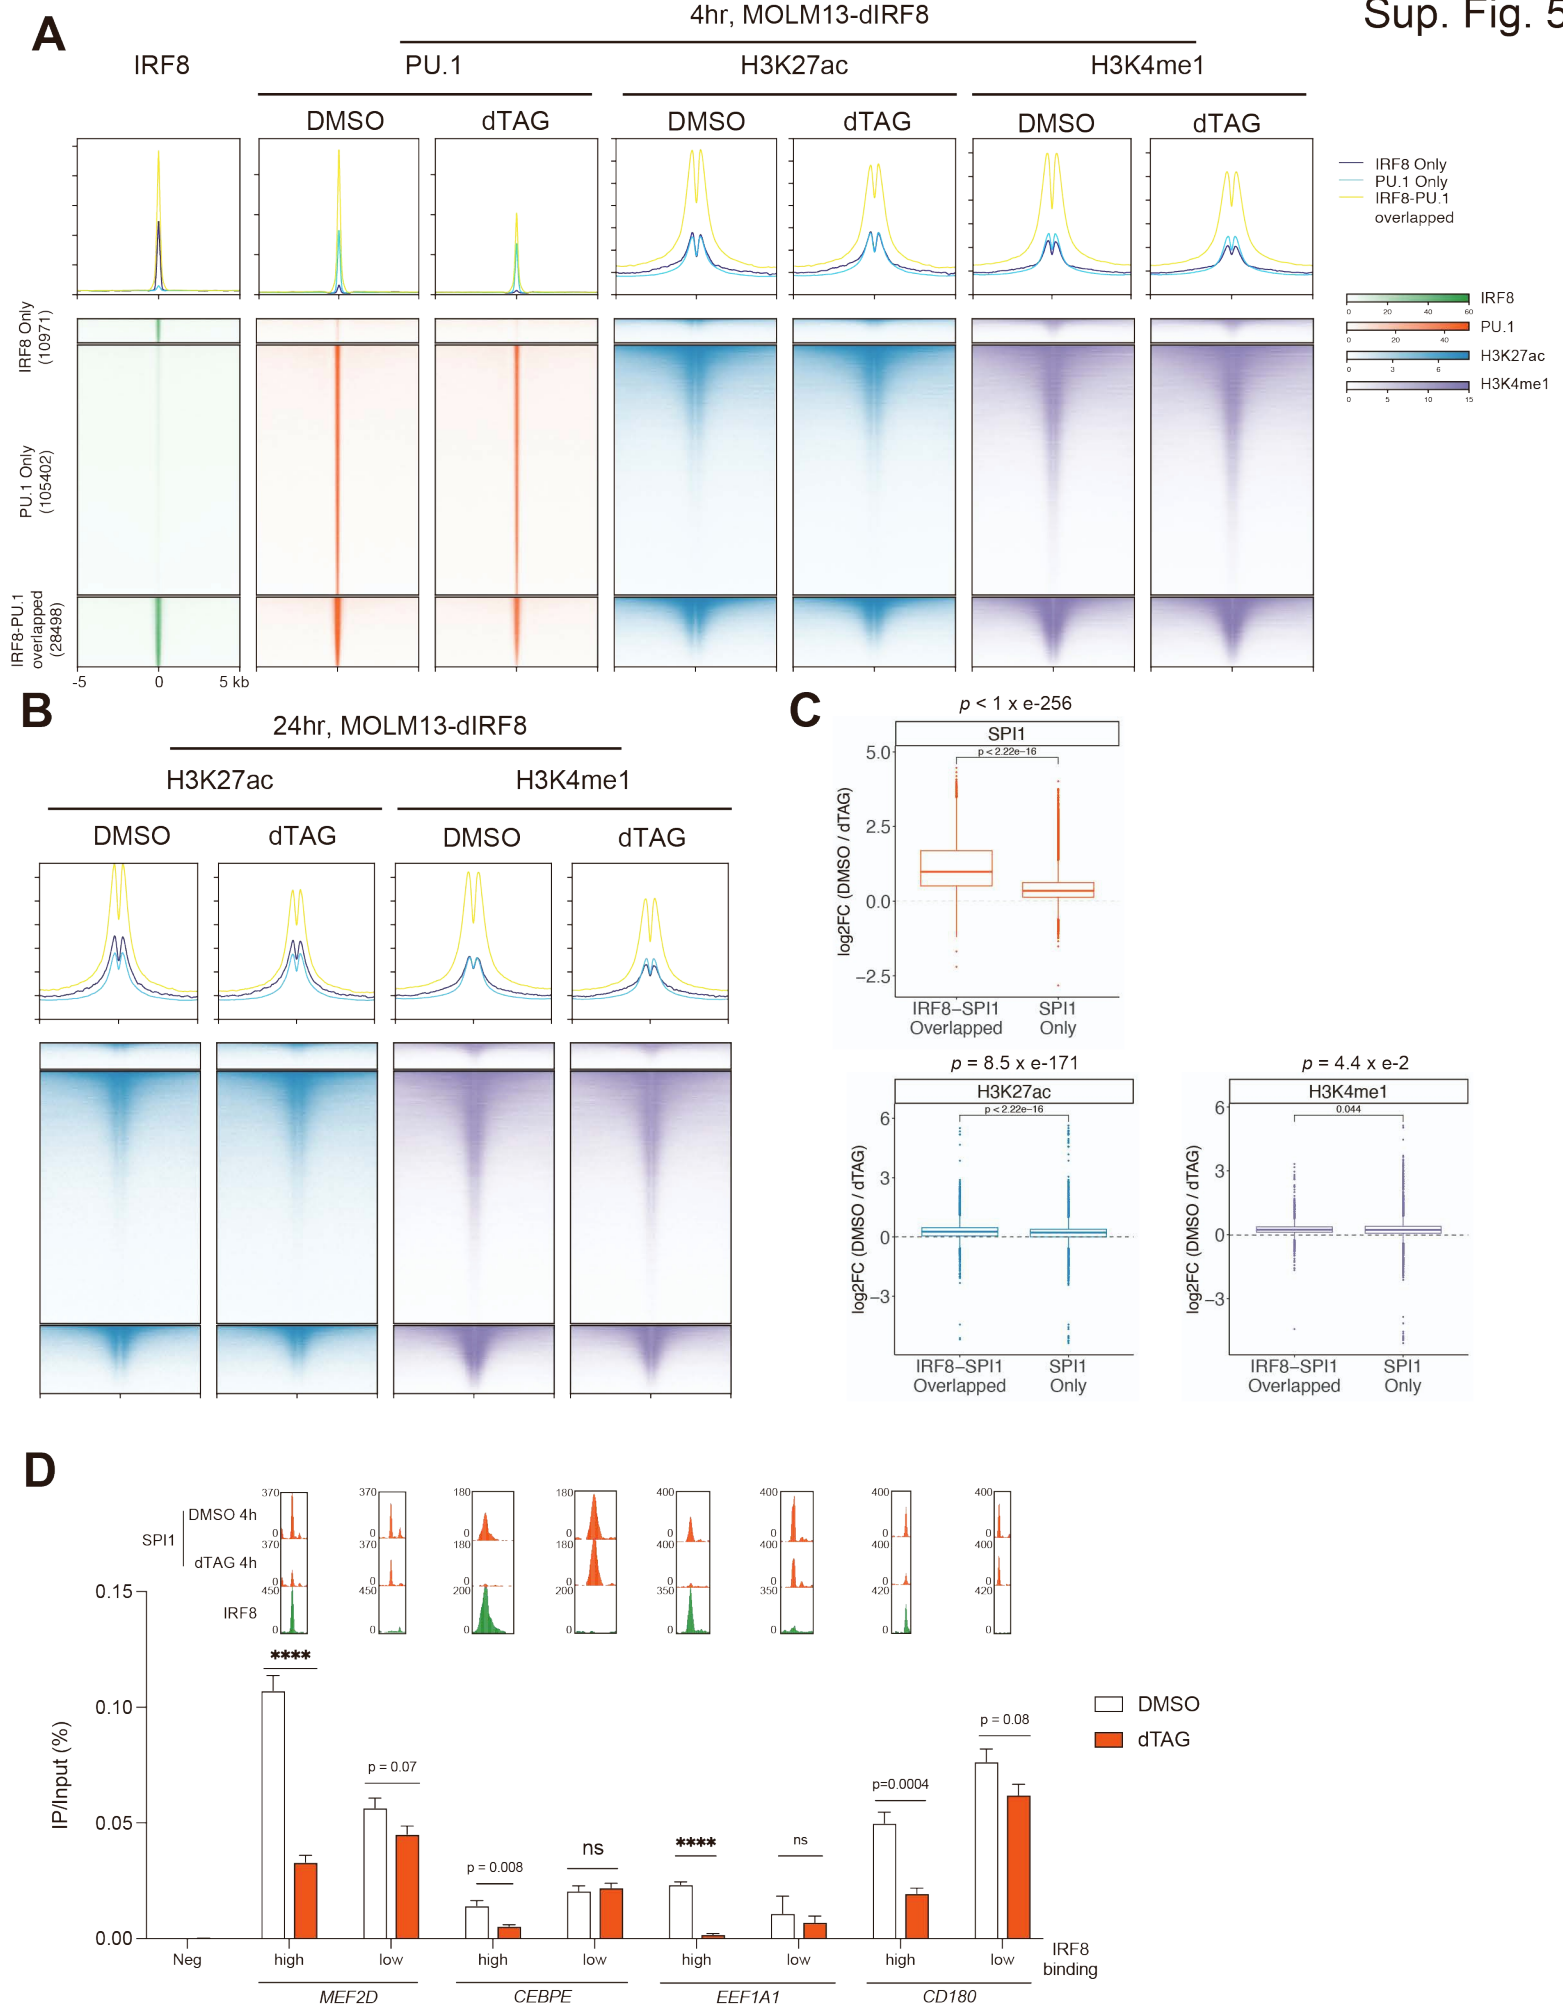



**Figure S5. IRF8 supports PU.1's chromatin occupancy and transcriptional output. Related to Figure 4.**

(A-B) Metaplots and heatmaps of ChIP-seq with indicated cells in Figure 4c at IRF8-only, PU.1 only and IRF8-PU.1 overlapped regions (n=3) upon 4hr (A) or 24hr (B) dTAG treatment. (C) Boxplots depicting the log<sub>2</sub>FC of DMSO vs dTAG tag counts of ChIP-seq in K. Two-side Welch's t-tests were performed for statistical analysis. (D) ChIP-qPCR with PU.1 antibody at select IRF8-high or low/unbound elements in MOLM13-dIRF8 cells treated with DMSO or 500nM dTAG-47 (n = 4-5, mean ± SEM).

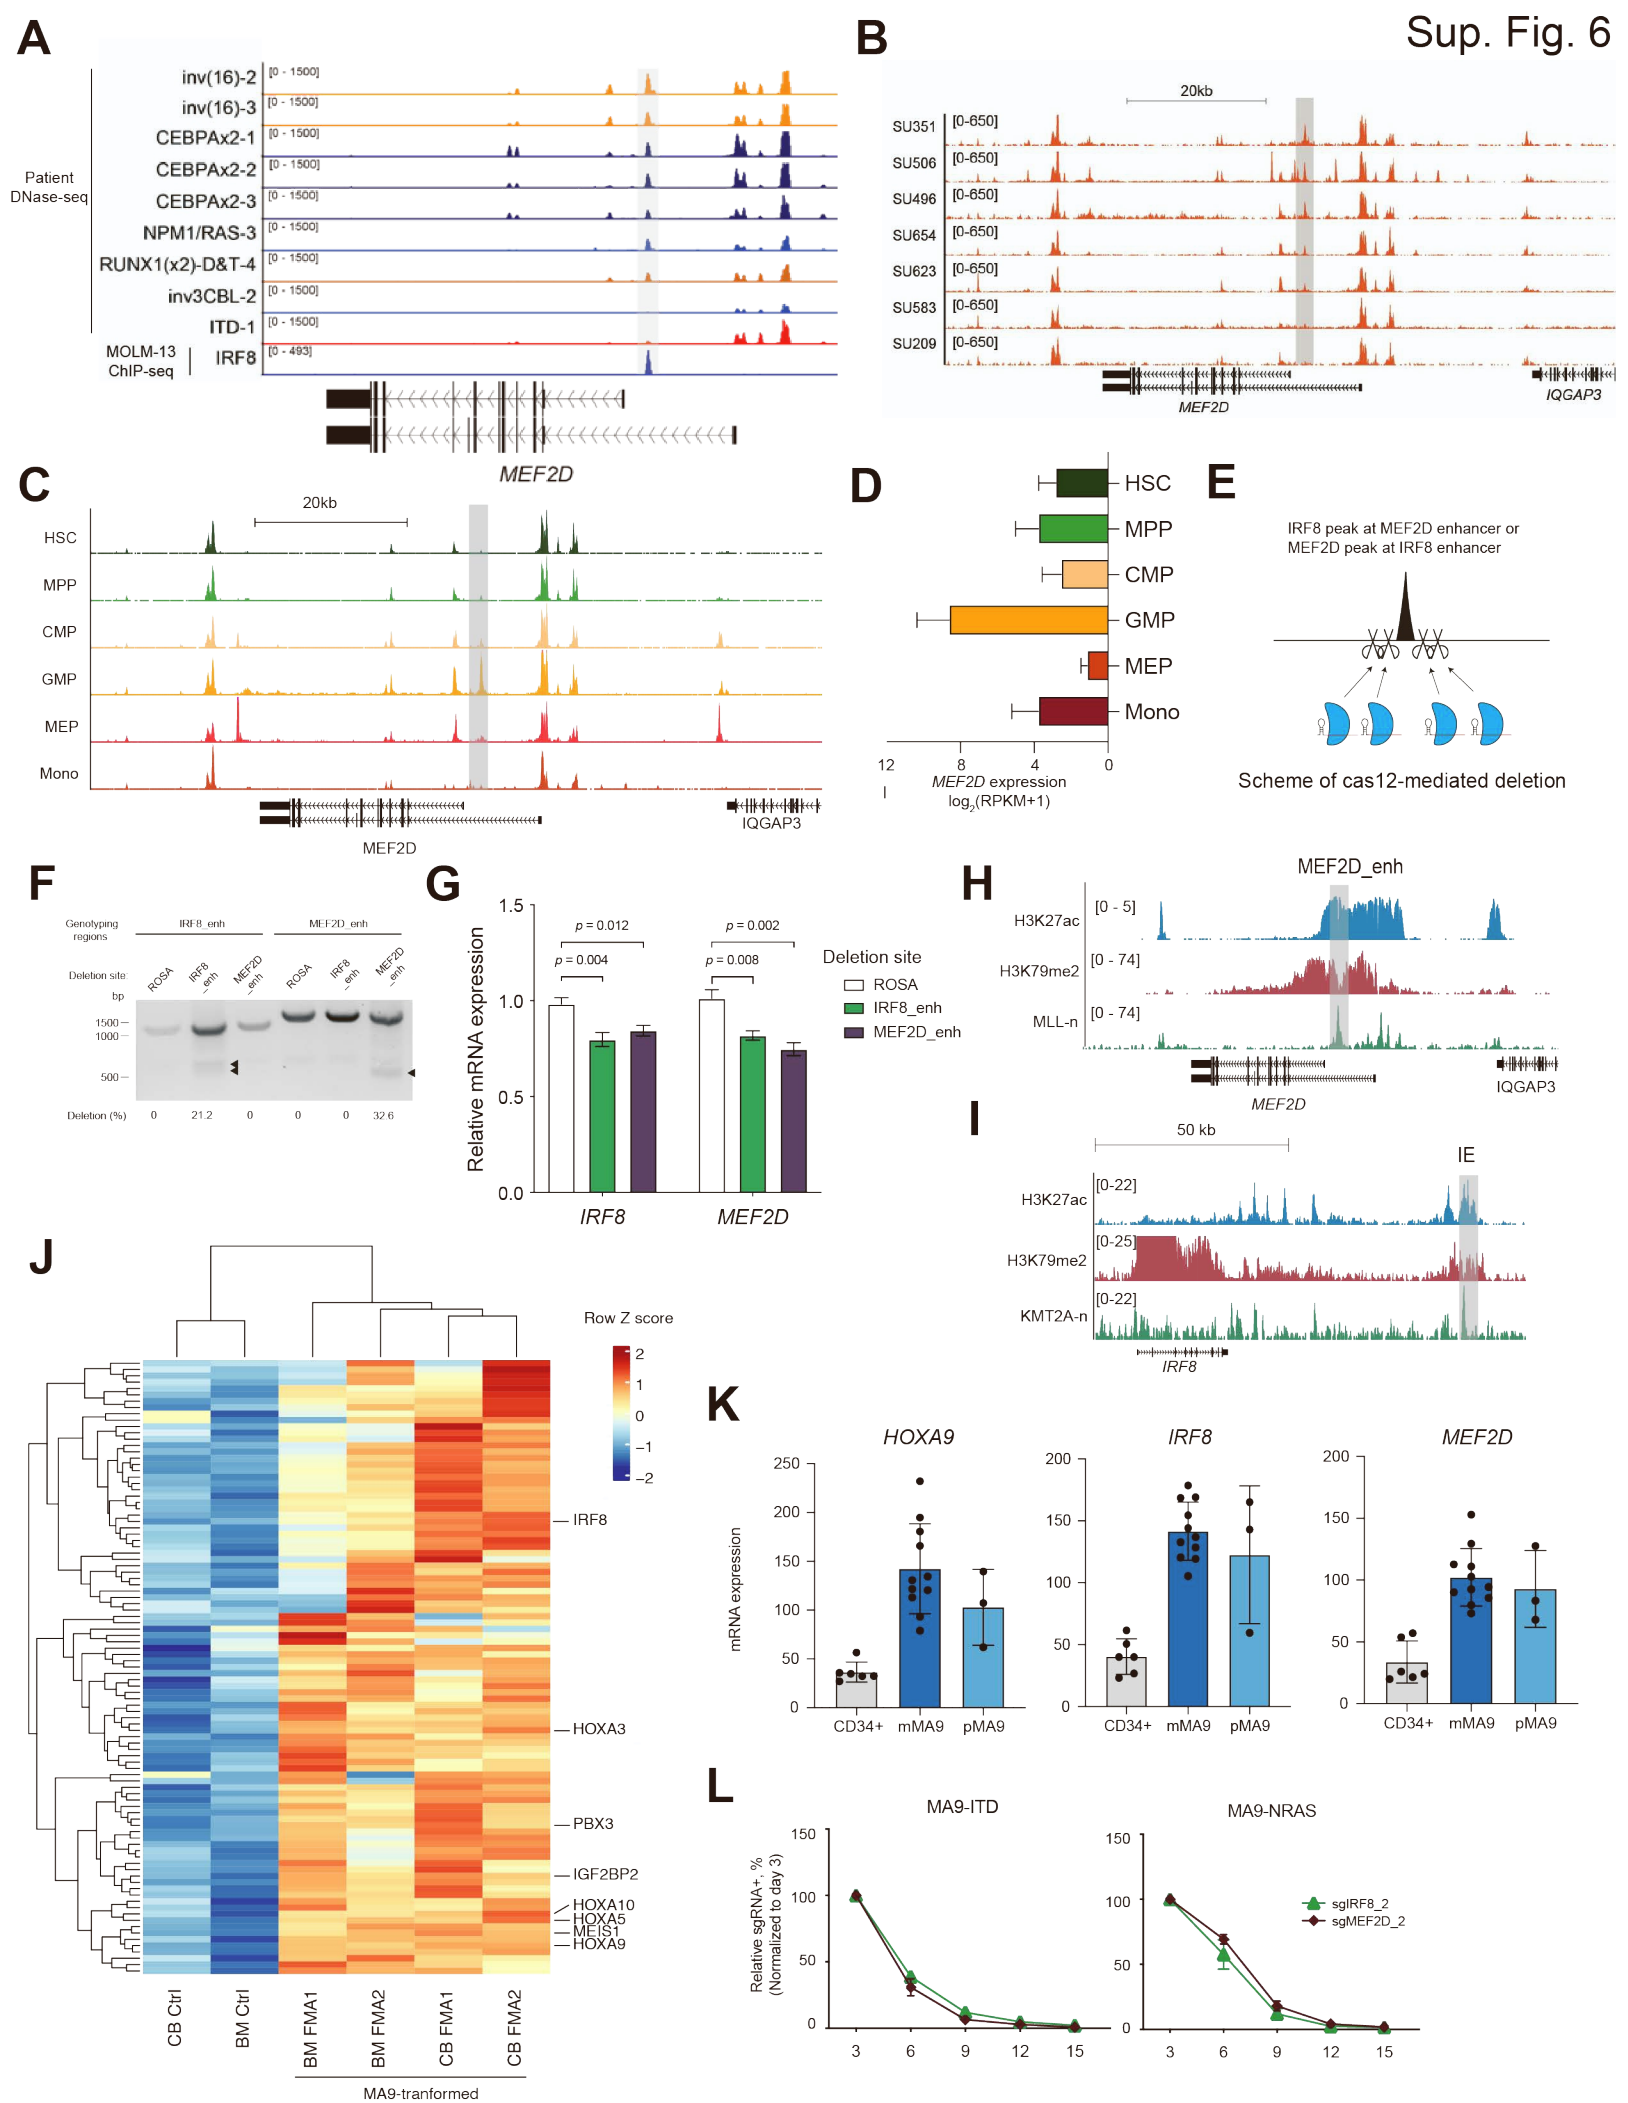

**Figure S6. MEF2D and IRF8 are upregulated in AML carrying KMT2A-r through enhancer reactivation. Related to Figure 5.**

(A) Gene tracks of DNase I-seq (Assi et al., 2019) signals in primary AML patients of indicated subtypes. MOLM-13 IRF8 ChIP-seq were from (Cao et al., 2021). (B) Gene tracks of ATAC-seq signals (Corces et al., 2016) in primary AML patients. (C) Gene tracks of ATAC-seq signals (Corces et al., 2016) in healthy donor hematopoietic cells in MEF2D locus. HSC, Hematopoietic stem cell; MPP, Multipotent progenitor; CMP, Common myeloid progenitor; GMP, Granulocyte monocyte progenitor; Mono, Monocyte; MEP, Megakaryocyte-erythroid progenitor. (D) Bar graph showing MEF2D mRNA expression in healthy donor hematopoietic cells. (E) Schematic of the crRNA design to conduct Cas12-mediated deletion of enhancers. (F) Genotyping and efficiency quantification of enhancer deletions in MOLM-13 cells on day 5 post-infection. ROSA serves as a negative control. Band intensities were normalized by product size. Percentage of anticipated enhancer deletion was calculated using normalized enhancer-deleted band (arrowhead) intensity divided by sum of normalized enhancer-deleted and intact band intensity. (G) RT-qPCR analysis of IRF8 and MEF2D after deletion of the IRF8 or MEF2D enhancer on day 5 post-infection (normalized to GAPDH, n=5-7, mean  $\pm$  SEM, Student's t-test). (H-I) Gene tracks of ChIP/CUT&RUN signals (Krivtsov et al., 2019) of H3K27ac, H3K79me2 and KMT2A-n at MEF2D or IRF8 (D) locus in MOLM-13 cells. (J) Heatmap depicting upregulated genes in lentivirus-mediated MA9-transformed HSPCs from both BM and CB compared with healthy donor HSPCs isolated from BM and CB (Horton et al., 2013). BM, Bone marrow. CB, Cord blood. (K) Significantly upregulated gene (including HOXA9, IRF8, MEF2D) expression in retrovirus-mediated MA9-transformed human AML cells. mMA9, isolated human CD34+ HSPC were transformed with MA9, maintained in culture (~30 days), engrafted into mice, and AML blast cells were harvested from mice that developed leukemia (Barabé et al., 2017). pMA9, pediatric MA9+ AML samples. (L) Competition-based proliferation assays in MA9-FLT3ITD (left) or MA9-NRASG12D (right) cells with indicated sgRNAs (n=3, mean  $\pm$  SEM).

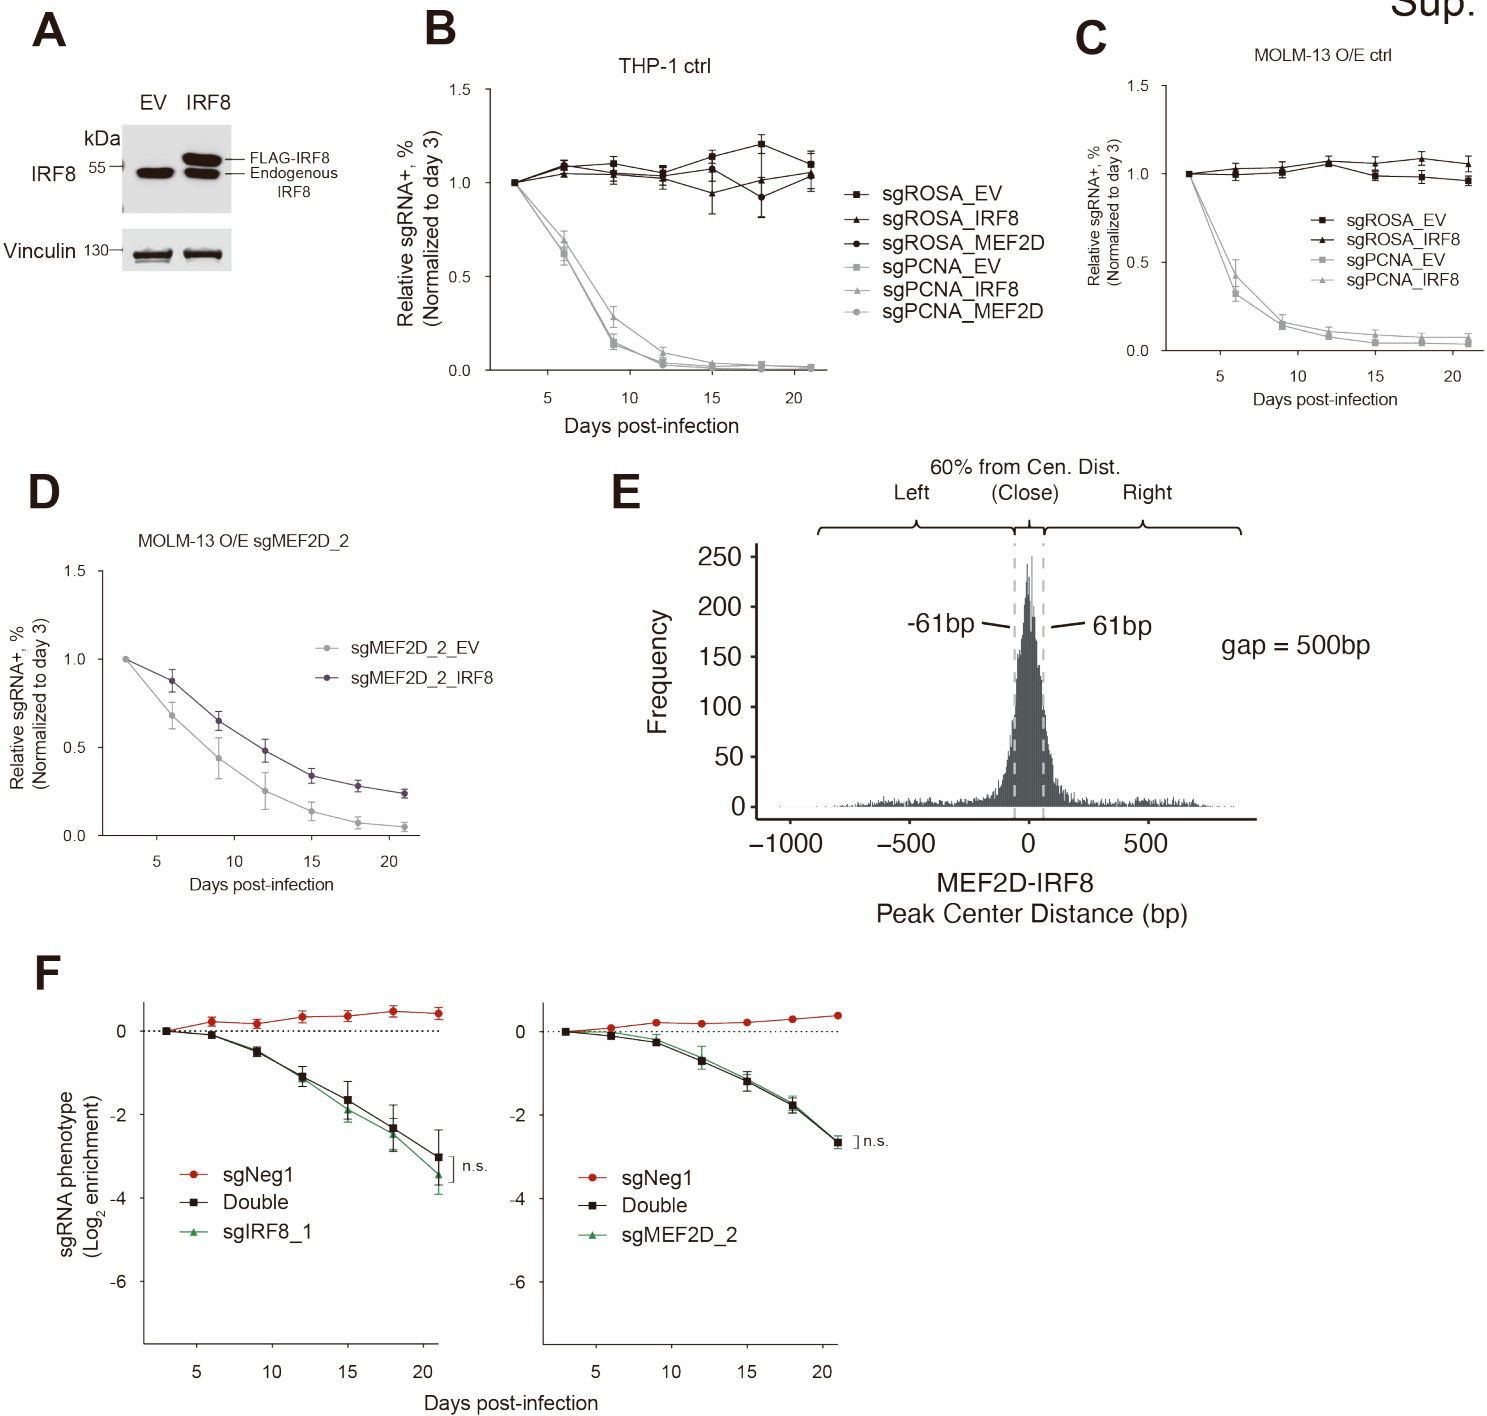

**Figure S7. Divergent function of MEF2D- and IRF8-regulated programs in supporting AML. Related to Figure 6.**

(A) Immunoblotting of endogenous IRF8 and FLAG-IRF8 in THP1 whole cell lysates with indicated vector expression. (B) Competition-based proliferation assays in THP-1 cells transduced with EV or indicated cDNA, and subsequently control sgRNA ( $n = 3-4$ , mean  $\pm$  SEM). (C-D) Competition-based proliferation assays in MOLM-13 cells transduced with EV or IRF8 cDNA (Cao et al., 2021), and subsequently indicated sgRNA ( $n = 3-4$ , mean  $\pm$  SEM). (E) Histogram depicting MEF2D-IRF8 peak distance distributions. A MEF2D-IRF8 peak pair will count if their distance is within 500bp (gap = 500). Distances that are the lowest 60% are considered “close”, and the others are considered “left” or “right” depending on IRF8 location at upstream or downstream. (F) Competition-based proliferation assays in THP-1 cells simultaneously transduced with sgIRF8\_1+ sgNeg1+ or sgMEF2D\_2+sgNeg1 linked with GFP or mCherry. Uninfected cells serve as an internal control ( $n = 2-4$ , mean  $\pm$  SEM. n.s., not significant, two-tailed Welch’s unpaired t-test).

PU.1 signature

|           |           |          |           |           |
|-----------|-----------|----------|-----------|-----------|
| TASL      | KIF20B    | ZNF33A   | DHX29     | ANKRD12   |
| MT-ATP8   | ATAD5     | RPS6KA4  | MS4A7     | PHF3      |
| BEX1      | GALNT6    | KMT2A    | ARIC5B    | COLGALT2  |
| HKC3      | AP1S3     | CCDC38B  | TTCC2     | EZF2      |
| CADM1     | MIS18BP1  | PRIM1    | ACVRL1    | IL6R      |
| VCAN      | CENPO     | PSTPIP1  | GOLGA2    | RAB11FIP2 |
| FYB1      | SMG5      | RPL41    | ASH1L     | ZFC3H1    |
| HL-2      | CEP83     | ALGAM1   | KLHL8     | DDX60     |
| PSMCL1    | DDX59     | IFT81    | ARHGAP25  | PEX1      |
| MTRNR2L12 | SIAE      | FZD3     | CSP1      | FNBP4     |
| EIF4A1    | ARL11     | AKAP9    | DYNCL12   | ZNF556    |
| GNL3      | LILRA2    | GCC2     | LTN1      | UBR4      |
| NM15A     | DAP1P     | PRR4L    | STOX2     | ZNF526    |
| GNL3L     | TXLNG     | DHX36    | PRRC2C    | CHORDC1   |
| JRKL      | ZC3H13    | TMF1     | THAP6     | HRH2      |
| ALG11     | FAHD2A    | CYBB     | PARP4     | PPP6R1    |
| IL12RB1   | SPTLC1    | PHACTR2  | SCAPER    | NDE1      |
| POA3      | CEP290    | ZFR      | ITSM1     | TLR2      |
| ITGA4     | PABPC3    | ZNF480   | ZGRF1     | PPIB      |
| FGI2      | SRGAP2C   | NSD1     | PRKAR2B   | CENPF     |
| NCR3LG1   | GIGYF2    | DNACJ21  | TGS1      | MAP7D3    |
| CDK11B    | ZCCHC9    | DDX60L   | CCDC82    | CLU       |
| CD84      | BOD1L1    | ZNF714   | PSPH      | ATF5      |
| COX16     | FILIP1L   | BST2     | NSRP1     | CEP89     |
| TYROBP    | REST      | CCDC125  | SCLT1     | PCM1      |
| ZNF675    | KPNA3     | CYP11B1  | RBM47     | NRDC      |
| CP2A      | GAPT      | USP16    | UVSSA     | RBBP5     |
| TOP1      | PTPN11    | PRPF4B   | CYP25L1   | ZBTB7A    |
| CNTRL     | TPR       | ZNF638   | STAT3     | NOX5      |
| TFEC      | CNTLN     | ROCK2    | CWC22     | RFC3      |
| ITGB1     | FAM107B   | KLF3     | PTMA      | FANCM     |
| CLSPN     | PUR1A     | RSL1D1   | PHF14     | BTBD7     |
| GOLGA4    | LRRFP1    | OSBPL1A  | SHKBP1    | ZNF440    |
| SMC3      | ESCO2     | TOPORS   | LY9       | NUCK1     |
| TONSL     | ZNF808    | ARID4B   | RINL      | MRPS31    |
| XRCC1     | CLUJ2     | ZNF280C  | AIF1      | STK36     |
| BAX       | ERCC1     | CASPBAP2 | SMC2      | FXR1      |
| EIF3A     | CEBP2     | ZMAT2    | CEP104    | UHRF1BP1L |
| BTX       | MTHFR     | CEP135   | TNFSF14   | PIGM      |
| TNFSF10   | MAP10     | PPP1R10  | KIAA0232  | CARD6     |
| SRRM1     | VAC14     | ARFGF2   | SIGLEC10  | ST3GAL6   |
| TC15      | RAD51AP1  | PWWP2A   | BTAF1     | GTNB4     |
| SAMHD1    | MTURN     | TGM5     | BICDL1    | SPAG9     |
| MT-ND6    | TRIM38    | DIAPH3   | IRF5      | CCR1      |
| ITPR2     | TCF4      | MOB1B    | MEX3A     | PLCL2     |
| CD36      | REV3L     | PONT     | SMC1A     | RRP15     |
| TMEM156   | FGD2      | GOLGA8B  | NMANL3    | AT7BP1C2  |
| PTPRC     | AFF3      | BPTF     | SUDS3     | RBL1      |
| REL       | SGK3      | DBF4     | TAF2      | LARS1     |
| LILRB4    | POLR1G    | GOLIM4   | SLC39A10  | GPR65     |
| GPATCH11  | PIBF1     | SRSF11   | ADCOT11   | PORCN     |
| ACS3      | GON4L     | CEP250   | NRG1N     | CCDC66    |
| MT-ND5    | SRECC1    | TRAAPC10 | PRRG4     | DDX52     |
| CPM       | DHTKD1    | CRYBG3   | CORO2A    | MT-ND2    |
| ANOS1     | LGALS9    | NOC3L    | BRD4      | PDCD7     |
| EEA1      | PUS7L     | FAM43A   | WASL      | CEP350    |
| SRECC1    | GON4L     | RALBP1   | SMARCC1   | MED25     |
| MYO18A    | AGTPBP1   | HEF      | NOP56     | DBF4B     |
| SBDS      | ASPM      | RAD50    | H2BC15    | BMP4      |
| SRFBP1    | KIF2A     | ENC1     | H2BC15    | ABCF1     |
| PIAFR     | CMTM7     | EIF4G3   | TBC1D8    | BZW1      |
| MEF8      | RBM25     | GOLGB1   | TENT5A    | ANKB1     |
| RBM41     | B4ZT2B    | RESF1    | DZIP3     | CNNM2     |
| BAZ1B     | HMG2      | TAF3     | NKTR      | MYSM1     |
| WDR70     | ZNF773    | RPA3     | ZSWIM9    | SLC66A1   |
| SERPINB8  | GPATCH8   | DDX10    | TOGARAM1  | CEP128    |
| YBX1      | LRRCS9    | ANKRD11  | PAK1      | MTRF1L    |
| ATRP      | INTS3     | ZNF670   | ATF7IP    | IFT74     |
| ARL13B    | TMEM159   | SLC12A5  | LARP7     | FAM138    |
| TRIP11    | PRPF38B   | PDS5B    | SBNO1     | LIMA1     |
| LVZ       | MYO5A     | MS4A6A   | KCNK6     | TTT1      |
| NLRC4     | ARHGAP26  | ENDOD1   | PRN2      | ZNF430    |
| XAF1      | VIT       | CD2AP    | RBM4      | PRPF18    |
| EEF1A1    | SUPT16H   | LPAR6    | OPD1      | FAM20C    |
| H2AC20    | FGD4      | ESF1     | TYW3      | HOOK3     |
| HDAC7     | KIF3A     | KRIT1    | ADA2      | BICD1     |
| POU2F2    | KIF3A     | ELF1     | CNN1CA1   | DNAIC2    |
| PRR11     | ANKRD26   | TOP2A    | CENPJ     | BICD2     |
| IRAK4     | APOBR     | FKBP8    | SLC9A7    | KIF15     |
| BDP1      | PTK2B     | GRN      | FCGR1A    | AARS01    |
| TTI1      | GRN       | PTPRE    | PKR35     | KTN1      |
| CCDC18    | TCE1A     | PDC13    | SHPRH     | MKIG7     |
| NFAT5     | VHL       | MT-ND1   | RAB29     | NME2      |
| MED24     | DENND1C   | PP1G     | TMEM183A  | LRRCC1    |
| CENPE     | CCDC88A   | NEXN     | ITGB3BP   | IF16      |
| CEP152    | SWAP70    | AP2B1    | SLC26A8   | ZNF836    |
| TPM3      | RB1LCC1   | ROCK1    | RBP1      | ANKRD36C  |
| DYNLT3    | MTDH      | ABC2     | SERPINB10 | BRCA2     |
| ZNF346    | CLP1      | STIM2    | HMOX1     | AKAP8     |
| ARIDA4    | ORA12     | ALKB4    | PEAK3     | RSF1      |
| CCDC186   | POLD3     | PGM2L1   | MNS1      | OSBP18    |
| PNOC      | CSF2RA    | EP300    | EPH4B     | APC       |
| NCF2      | RGS18     | GAS2L3   | UTP23     | ZNF326    |
| TM95F1    | MS444A    | IRF2     | TRIM14    | BUB1      |
| LUZP1     | LPAR4     | IRF2     | SLTM      | CLINT1    |
| ASRG11    | MPHOSPH10 | TBC1D32  | NLS3      | PAK2      |
| SUTRK4    | NDUJF52   | ALDH4A1  | RBBP6     | RNASE3    |
|           | KIF16B    | CHD1     | ERCC6L2   | GPATCH4   |
|           | HMGNS5    | SAFB2    | ESCO1     | LTV1      |
|           |           | CCDC112  | TIFAB     | TLN1      |
|           |           | ZC3H18   | METTL2B   | CHST2     |
|           |           | JMJD1C   |           | DTNA      |
|           |           |          |           | PHF20L1   |
|           |           |          |           | FAM135A   |
|           |           |          |           | ZNF106    |
|           |           |          |           | INHBA     |

**Table S1. PU.1 signature used in this study. Related to Figure 4.** Note: PU.1 signature was defined as top 500 downregulated genes upon CRISPR/Cas9-mediated PU.1 depletion in MOLM-13 cells.

| sgRNA/crRNA Name | sgRNA/crRNA Sequence    | Note                                      |
|------------------|-------------------------|-------------------------------------------|
| sgMEF2D_1        | TCCAGCGAATCACCGACGAG    |                                           |
| sgMEF2D_2        | ACTTTCACCAAGCGGAAGTT    |                                           |
| sgPU.1_1         | GCTCCGCAGCGGCGACATGA    |                                           |
| sgPU.1_2         | GCAGCGCGCGGCCATCTTC     |                                           |
| sgMEF2D_enh_1    | CTAATGGTTAGATCAGGGGA    |                                           |
| sgMEF2D_enh_2    | ATGAGCCAATGGAGGCCTAG    |                                           |
| sgMEF2D_enh_3    | TGCCAAAAGACTTCAGGGT     |                                           |
| sgNeg            | GAAGATGGGCGGGAGTCTTC    | sgRNA targeting ROSA                      |
| sgNeg2           | GGCCAGGCTTTGGGGAGGCC    | sgRNA targeting neuronal gene <i>EMX1</i> |
| sgPCNA           | GGACTCGTCCCACGTCTCTT    |                                           |
| sgIRF8_1         | ATTGACAGTAGCATGTATCC    |                                           |
| sgIRF8_2         | AGAGCATGTTCCGGATCCCT    |                                           |
| crROSA-1         | CAACAATAGATGTATTGAGA    |                                           |
| crROSA-2         | GGCCTATTCTCAGTCCAGGG    |                                           |
| crROSA-3         | AGTGTCTATCACCTCTCCCG    |                                           |
| crROSA-4         | TTGATCCTTTGCCTTGATCC    |                                           |
| crIRF8_1         | TCTGATTCTGCCAAGTCCCC    |                                           |
| crIRF8_2         | GCCCTATCGTACAGAGTCTG    |                                           |
| crIRF8_3         | CCTGAGGCCACACAGTGATG    |                                           |
| crIRF8_4         | TGCCAAGTTCCTCTCCTTCA    |                                           |
| crMEF2D_1        | TCAGAAGCCCTCCAACCAAGCAT |                                           |
| crMEF2D_2        | GGGTCCCCTGTCATCATCGTAGG |                                           |
| crMEF2D_3        | CACCTCCCCTTTCTCATAATTG  |                                           |
| crMEF2D_4        | AGCCCCAGAGACTACTTTGAGTC |                                           |
| sgNeg3           | AATGGCAACTGGTCCCCTTC    | sgRNA targeting murine <i>Ano9</i>        |
| sgRpa3           | ACGGGCCGGTTCGATATACTG   |                                           |
| sgMef2d_1        | GCACAGCACACTCAGCTCGT    |                                           |
| sgMef2d_2        | GAGCAGCACCTTGTCCATGT    |                                           |

**Table S2. sgRNA/crRNA sequences. Related to Figure 2-5.**

| Primer name   | Primer sequence         | Usage        | Note                                                                                               |
|---------------|-------------------------|--------------|----------------------------------------------------------------------------------------------------|
| GAPDH_F       | CCTGACCTGCCGTCTAGAAA    | RT-qPCR      |                                                                                                    |
| GAPDH_R       | CTCCGACGCCTGCTTCAC      | RT-qPCR      |                                                                                                    |
| MEF2D_all_F   | atggggagagggctctcagt    | RT-qPCR      | Primers to amplify the last exons of MEF2D that both isoforms contain (NM_005920 and NM_001271629) |
| MEF2D_all_R   | cacagaccatcccagtggtg    | RT-qPCR      |                                                                                                    |
| MEF2D_short_F | AGTTCTTAGGGTGCCTGGGG    | RT-qPCR      | Primers to detect the MEF2D short isoform                                                          |
| MEF2D_short_R | AGGATACCTTCGACTGGGGA    | RT-qPCR      |                                                                                                    |
| MEF2D_long_F  | GACAACACCGTCCCCCAG      | RT-qPCR      | Primers to detect the MEF2D long isoform                                                           |
| MEF2D_long_R  | GCTCATGAACGGTCTGGGAA    | RT-qPCR      |                                                                                                    |
| ChIP_Neg_F    | GGTCAGGCCAACTTGATTGT    | ChIP-qPCR    | hg19: Chr8: 129846262 -129846360                                                                   |
| ChIP_Neg_R    | AATTTGTGTTGGGCCACATT    | ChIP-qPCR    |                                                                                                    |
| PU1_ChIP_1F   | TGTGTCACCTTCCACTCC      | ChIP-qPCR    | chr1:156462569-156462638, IRF8 high                                                                |
| PU1_ChIP_1R   | GCTGCCACTTTCACCTCTGT    | ChIP-qPCR    |                                                                                                    |
| PU1_ChIP_2F   | TTGTATCTGGTGTGGGGTAGG   | ChIP-qPCR    | chr1:156493761-156493830, IRF8 low                                                                 |
| PU1_ChIP_2R   | TGGTGTTCAGGACAACTGGAA   | ChIP-qPCR    |                                                                                                    |
| PU1_ChIP_3F   | AAGTGTGCCCTCTGGCTCT     | ChIP-qPCR    | chr14:23584348-23584418, IRF8 high                                                                 |
| PU1_ChIP_3R   | GCTGAACACATCCCAATCCT    | ChIP-qPCR    |                                                                                                    |
| PU1_ChIP_4F   | TCTGCTTCCTTTCTCTCTC     | ChIP-qPCR    | chr14:23588485-23588569, IRF8 low                                                                  |
| PU1_ChIP_4R   | CTCCCTGAGTCACCCAAG      | ChIP-qPCR    |                                                                                                    |
| PU1_ChIP_5F   | TGCTAAAATGTGGCCTGTCA    | ChIP-qPCR    | chr6:74224970-74225067, IRF8 high                                                                  |
| PU1_ChIP_5R   | TGGGACACGATTTGTTGAGA    | ChIP-qPCR    |                                                                                                    |
| PU1_ChIP_6F   | GAAAAAGGCGGAGCCAGTA     | ChIP-qPCR    | chr6:74230806-74230876, IRF8 low                                                                   |
| PU1_ChIP_6R   | AACCGTGCCTAGAGAAGGT     | ChIP-qPCR    |                                                                                                    |
| PU1_ChIP_7F   | AGCTGAAGGGGGAAGAAGAA    | ChIP-qPCR    | chr5:66489087-66489173, IRF8 high                                                                  |
| PU1_ChIP_7R   | GGCCGTTTTTCAAGGGTAA     | ChIP-qPCR    |                                                                                                    |
| PU1_ChIP_8F   | GTGGCTCTGTGCTGAAAA      | ChIP-qPCR    | chr5:66492618-66492711, IRF8 low                                                                   |
| PU1_ChIP_8R   | GGGGTTGGTCTCAGTTAT      | ChIP-qPCR    |                                                                                                    |
| IRF8_geno_F   | CATGCCTGAACAAACCCACT    | genotyping   |                                                                                                    |
| IRF8_geno_R   | CCCTCATCTCCCCACACTAA    | genotyping   |                                                                                                    |
| MEF2D_geno_F  | AAGGGGTGTGAAATCACGAG    | genotyping   |                                                                                                    |
| MEF2D_geno_R  | CTTTCTGAAAGCAGCAAGC     | CUT&RUN-qPCR | chr16:86018660-86018735                                                                            |
| enIRF8_p2F2   | TCAAAGAAGTGTGCTTTGCTTCG | CUT&RUN-qPCR | chr16:86016462-86016524                                                                            |
| enIRF8_p2R2   | GAAGTGCCTATGCTGCCTTC    |              |                                                                                                    |
| enIRF8_p1F2   | TGGCCATGTGTCTATGTG      |              |                                                                                                    |
| enIRF8_p1R2   | CCACCCACTGACACGAGAG     |              |                                                                                                    |

**Table S3 qPCR/genotyping primer sequences. Related to Figure 2-5.**

| Collection ID | Sample Type | Collection Status | Diagnosis | Subtype            | WBC   | Gene  | Categorization     | Kein Mutation Type | Protein Change | NA Mutation Type | cDNA Change | Variant Effect     | Insertion Length | FAF % | Position  | Exon |
|---------------|-------------|-------------------|-----------|--------------------|-------|-------|--------------------|--------------------|----------------|------------------|-------------|--------------------|------------------|-------|-----------|------|
| 4943          | Pheresis    | De Novo           | AML       | AML with 11q23 abn | 109.2 | PHF6  | Disease Associated | frameshift         | p.M46Ifs*3S    | deletion         | c.138delG   | FRAME_SHIFT        |                  | 96.12 | 133511785 |      |
| 6315          | Pheresis    | De Novo           | AML       | AML with 11q23 abn | 133.5 | FLT3  | Disease Associated | substitution       | c.1352C>T      | missense         | p.S451F     | missense_variant   | 1                | 22.97 | 28610138  | 11   |
|               |             |                   |           |                    |       | NRAS  | Disease Associated | substitution       | c.34G>T        | missense         | p.G12C      | missense_variant   | 1                | 5.26  | 115258748 | 2    |
|               |             |                   |           |                    |       | NRAS  | Disease Associated | substitution       | c.182A>T       | missense         | p.Q61L      | missense_variant   | 1                | 15.51 | 115256529 | 3    |
|               |             |                   |           |                    |       | STAG2 | Disease Associated | duplication        | c.1023_1024dup | frameshift       | p.E342Vfs*3 | frameshift_variant | 1                | 41.49 | 123184975 | 12   |

Table S4. clinical follow-up of AML patients used in this study. Related to Figure 5.



| Name     | Genetics                                       | Subtype              |
|----------|------------------------------------------------|----------------------|
| MOLM-13  | MLL-AF9/FLT3-ITD                               | AML                  |
| MOLM-14  | MLL-AF9/FLT3-ITD                               | AML                  |
| MV4;11   | MLL-AF4/FLT3-ITD                               | AML                  |
| NOMO-1   | MLL-AF9/KRASG13D/TP53/EP300                    | AML                  |
| THP-1    | MLL-AF9/NRASG12D/TP53                          | AML                  |
| OCI-AML3 | DNMT3AR882C/NRASQ61L/NPM1mut                   | AML                  |
| ML-2     | MLL-AF6/KRASA146V                              | AML                  |
| OCI-AML2 | MLL-AF6                                        | AML                  |
| MONOMAC1 | MLL-AF9/FLT3V592A/RUNX1A107V/TP53              | AML                  |
| OCI-AML5 | ASXL1/RUNX1/TET2/EZH2                          | AML                  |
| U937     | CALM-AF10/PTEN/TP53/JAK3M511I                  | AML                  |
| EOL1     | KMT2A-amp                                      | AML                  |
| HEL      | JAK2V617F/TP53                                 | AML                  |
| SET2     | JAK2V617F/TP53/DNMT3AR882H                     | AML                  |
| P31/FUJ  | KMT2Amut/NRASG12C/[TEN/RAD21H208R/TP53         | AML                  |
| SH11     | MLL-AF6/KRASQ61H/TP53                          | AML                  |
| KASUMI1  | AML1-ETO/KIT/RAD21/TP53                        | AML                  |
| OCIM2    | RUNX1-TSPEAR/NRASQ61K/TP53                     | AML                  |
| HEL9217  | JAK2V617F/TP53                                 | AML                  |
| TF1      | CBFA2T3-ABHD12/NRASQ61P/TP53                   | AML                  |
| F36P     | KMT2Amut/TP53                                  | AML                  |
| NB4      | PML-RARA/KRASA18D/TP53                         | AML                  |
| AML193   | NRASG13V/TP53                                  | AML                  |
| M07E     | ANO7-DHDH /CBFA2T3-GLIS2/NRASQ61K              | AML                  |
| MUTZ8    | JAK2V617F                                      | AML                  |
| KO52     | DNMT3AR882C/NRASG13R/TP53                      | AML                  |
| EM2      | BCR-ABL1/TP53                                  | CML                  |
| K562     | BCR-ABL1/TP53                                  | CML                  |
| KYO1     | BCR-ABL1/TP53                                  | CML                  |
| KU812    | BCR-ABL1/TP53                                  | CML                  |
| NCO2     | BCR-ABL1/TP53                                  | CML                  |
| KCL22    | BCR-ABL1/TP53                                  | CML                  |
| JURLMK1  | BCR-ABL1/TP53/KMT2D                            | CML                  |
| JURKAT   | TP53/NOTCHR1627H/FBXW7/BAX/MSH2/MSH6           | T-ALL                |
| PF382    | TP53/NOTCH1                                    | T-ALL                |
| SUPT1    | TP53/PIK3CA/KIT/EGFR                           | T-ALL                |
| HSB2     | NOTCH1L1600P//NRASG12C/TP53.PIK3R1.FGFR3/ERBB2 | T-ALL                |
| NALM16   | NOTCHD1698N                                    | B-ALL                |
| HB1119   | TP53/MLL-ENL                                   | B-ALL                |
| SEMK2    | MLL-AF4/CDKN2A/TP53                            | B-ALL                |
| JM1      | BCL2/KMT2D                                     | B-ALL                |
| ROS50    | BCL2/BCL3/TP53                                 | B-ALL                |
| P30OHK   | ASXL1/ASXL3/BCL9/KMT2Amut/KMT2D                | B-ALL                |
| 697      | TCF3-PBX1/                                     | B-ALL                |
| SEM      | MLL-AF4/CDKN2A/TP53                            | B-ALL                |
| NALM6    | EGFR/NRASA146T/RARA                            | B-ALL                |
| Cll      | Unspecified                                    | B-cell non-specified |
| HG3      | KMT2B/KMT2D/RARA                               | B-cell non-specified |
| PGA1     | KRASA146V/XPO1                                 | B-cell CLL           |
| MEC1     | R3HCC1L-HTRA1/TP53                             | B-cell CLL           |
| Cl       | Unspecified                                    | B-cell CLL           |
| REH      | TEL1-RUNX1                                     | B-ALL                |

**Table S5. Leukemia cell line information. Related to Figure 1.**

| Sample Name                                 | % Dups     | % GC              | M Seqs            |                |
|---------------------------------------------|------------|-------------------|-------------------|----------------|
| MOLM13_dIRF8_4h_DMSO_H3K27ac_rep2_S1_R1_001 | 18.90%     | 46%               | 18.6              |                |
| MOLM13_dIRF8_4h_DMSO_H3K27ac_rep3_S5_R1_001 | 28.10%     | 46%               | 19.9              |                |
| MOLM13_dIRF8_4h_DMSO_H3K4me1_rep2_S2_R1_001 | 11.40%     | 43%               | 19.7              |                |
| MOLM13_dIRF8_4h_DMSO_H3K4me1_rep3_S6_R1_001 | 18.00%     | 42%               | 19.7              |                |
| MOLM13_dIRF8_4h_DMSO_PU1_rep2_S13_R1_001    | 20.80%     | 40%               | 21.7              |                |
| MOLM13_dIRF8_4h_DMSO_PU1_rep3_S14_R1_001    | 26.10%     | 41%               | 20.5              |                |
| MOLM13_dIRF8_4h_DMSO_input_rep3_S11_R1_001  | 7.40%      | 38%               | 19.5              |                |
| MOLM13_dIRF8_4h_dTAG_H3K27ac_rep2_S3_R1_001 | 18.40%     | 46%               | 22.2              |                |
| MOLM13_dIRF8_4h_dTAG_H3K27ac_rep3_S7_R1_001 | 19.30%     | 46%               | 21.1              |                |
| MOLM13_dIRF8_4h_dTAG_H3K4me1_rep2_S4_R1_001 | 12.00%     | 42%               | 23.4              |                |
| MOLM13_dIRF8_4h_dTAG_H3K4me1_rep3_S8_R1_001 | 13.70%     | 42%               | 19.3              |                |
| MOLM13_dIRF8_4h_dTAG_PU1_rep2_S15_R1_001    | 25.50%     | 40%               | 20.7              |                |
| MOLM13_dIRF8_4h_dTAG_PU1_rep3_S16_R1_001    | 21.20%     | 41%               | 18.5              |                |
| MOLM13_dIRF8_4h_dTAG_input_rep3_S12_R1_001  | 8.00%      | 38%               | 21.5              |                |
| MOLM13_dIRF8_DMSO_4h_input_rep2_S9_R1_001   | 6.10%      | 38%               | 20.7              |                |
| MOLM13_dIRF8_dTAG_4h_input_rep2_S10_R1_001  | 5.30%      | 38%               | 19                |                |
| MOLM13_dI8_24hr_DMSO_H3K27ac_S2_R1_001      | 5.00%      | 48%               | 16.5              |                |
| MOLM13_dI8_24hr_DMSO_H3K4me1_S1_R1_001      | 3.40%      | 42%               | 19.9              |                |
| MOLM13_dI8_24hr_DMSO_input_S9_R1_001        | 4.30%      | 38%               | 21.5              |                |
| MOLM13_dI8_24hr_dTAG_H3K27ac_S4_R1_001      | 6.30%      | 46%               | 21.7              |                |
| MOLM13_dI8_24hr_dTAG_H3K4me1_S3_R1_001      | 3.80%      | 42%               | 15.2              |                |
| MOLM13_dI8_24hr_dTAG_input_S10_R1_001       | 3.60%      | 37%               | 20.1              |                |
| MOLM13_dI8_4hr_DMSO_H3K27ac_S17_R1_001      | 7.70%      | 44%               | 22.5              |                |
| MOLM13_dI8_4hr_DMSO_H3K4me1_S16_R1_001      | 5.60%      | 41%               | 21.2              |                |
| MOLM13_dI8_4hr_DMSO_SPI1_S18_R1_001         | 23.10%     | 40%               | 31.6              |                |
| MOLM13_dI8_4hr_DMSO_input_S22_R1_001        | 4.20%      | 38%               | 24.9              |                |
| MOLM13_dI8_4hr_DMSO_old_H3K4me1_S15_R1_001  | 2.10%      | 41%               | 14.8              |                |
| MOLM13_dI8_4hr_dTAG_H3K27ac_S20_R1_001      | 7.60%      | 48%               | 27.5              |                |
| MOLM13_dI8_4hr_dTAG_H3K4me1_S19_R1_001      | 4.40%      | 43%               | 45.8              |                |
| MOLM13_dI8_4hr_dTAG_SPI1_S21_R1_001         | 9.30%      | 38%               | 35.2              |                |
| MOLM13_dI8_4hr_dTAG_input_S23_R1_001        | 5.10%      | 37%               | 21.9              |                |
| MOLM13_abMEF2D_sgROSA_S2_R1_001             | 32.40%     | 43%               | 26.3              |                |
| MOLM13_abMEF2D_zd370_S3_R1_001              | 11.10%     | 40%               | 22.6              |                |
| p592_RNAseq_rep1_S30_R1_001                 | 25.30%     | 46%               | 28.9              |                |
| p592_RNAseq_rep2_S31_R1_001                 | 26.90%     | 46%               | 44.2              |                |
| p592_RNAseq_rep3_S32_R1_001                 | 22.50%     | 45%               | 30.3              |                |
| p6315_RNAseq_S20_R1_001                     | 47.40%     | 48%               | 53.6              |                |
| p6315_H3K27ac_S15_R1_001                    | 27.80%     | 41%               | 27.9              |                |
| p6315_IgG_R2_001                            | 12.38%     | 40%               | 26.7              |                |
| p592_IgG_S3_R1_001                          | 13.00%     | 43%               | 11.8              |                |
| p592_H3K27ac_S4_R1_001                      | 19.40%     | 44%               | 18.8              |                |
| MOLM13-MEF2D_CnR_R1                         | 38.00%     | 41%               | 30.3              |                |
| RNA-seq sample names                        | raw reads  | Reads for mapping | Uniquely mapped % | Detected genes |
| MOLM13_sgPU.1_1                             | 9117166    | 9096042           | 84.26             | 16861          |
| MOLM13_sgPU.1_2                             | 6,867,041  | 6,843,441         | 83.82             | 16,126         |
| MV4-11_sgNeg_1                              | 6,621,709  | 6,541,535         | 79.53             | 18,004         |
| MV4-11_sgNeg_2                              | 10,716,591 | 10,534,472        | 83.14             | 18,771         |
| MV4-11_sgMEF2D_1                            | 6,585,449  | 6,515,395         | 84.93             | 18,552         |
| MV4-11_sgMEF2D_2                            | 10,826,709 | 10,698,745        | 84.17             | 18,906         |
| THP1_sgNeg_1                                | 8,938,746  | 8,879,572         | 87.27             | 19,890         |
| THP1_sgNeg_2                                | 9,706,061  | 9,418,568         | 84.66             | 19,674         |
| THP1_sgMEF2D_2_1                            | 7,606,948  | 7,504,885         | 85.38             | 19,712         |
| THP1_sgMEF2D_2_2                            | 9,667,084  | 9,526,538         | 85.48             | 19,743         |
| K562_sgNeg_1_1                              | 6,547,677  | 6,465,326         | 85.89             | 17,191         |
| K562_sgNeg_1_2                              | 9,717,573  | 9,622,461         | 85.85             | 18,157         |
| K562_sgMEF2D_1                              | 9,358,548  | 9,244,481         | 86.08             | 18,328         |
| K562_sgMEF2D_2                              | 8,913,217  | 8,789,998         | 85.89             | 18,175         |

**Table S6. Sequencing data information. Related to Figure 3-4.**
